# Supplementary material
Source: bioRxiv or medRxiv preprint supplement (https://www.biorxiv.org/highwire/filestream/92930/field_highwire_adjunct_files/4/296665-5.pdf)
Supplement: Supplementary file [file 296665-5.pdf]

# Control

# *NCC<sup>Dlx5</sup>*

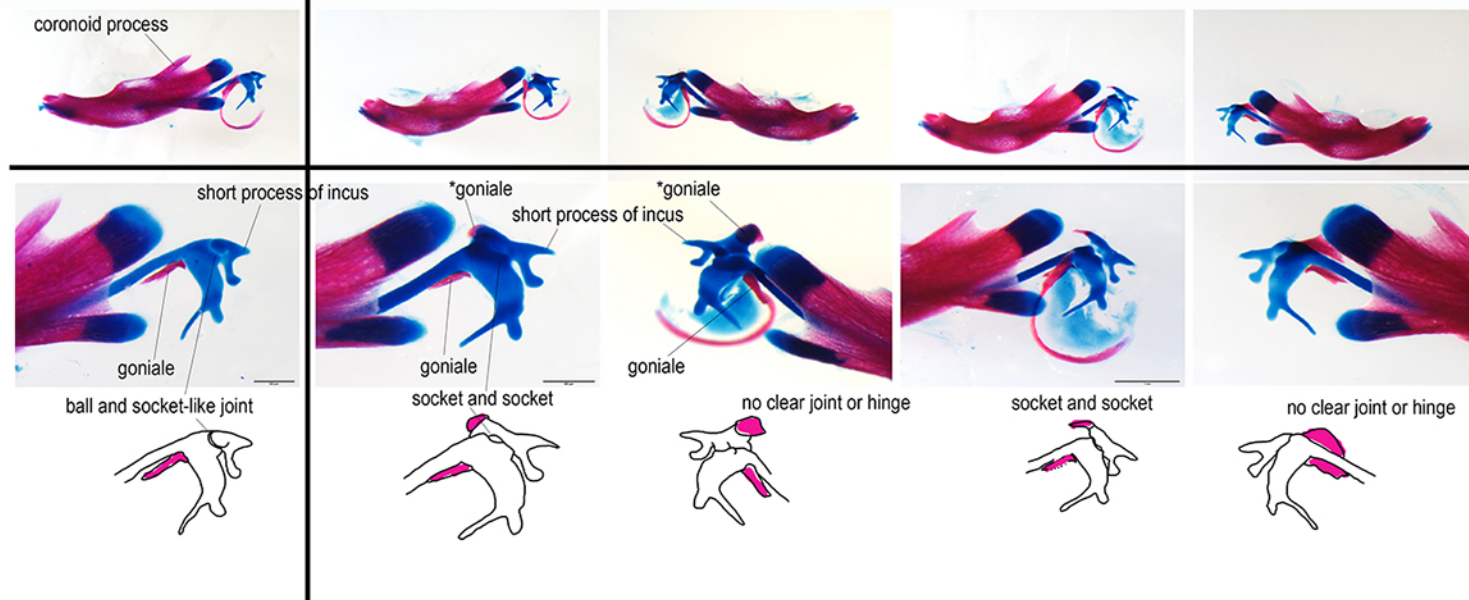

Shimizu et al., Supplementary Figure 5
